# Supplementary material for: Topological data analysis identifies distinct biomarker phenotypes during the ‘inflammatory’ phase of COVID-19
Source: bioRxiv or medRxiv preprint supplement (doi:10.1101/2021.12.25.21268206), 2021-12-29
Supplement: Supplementary file [file media-1.pdf]

**Table S1.** Multivariable logistic regression models for clusters and plasma immune biomarker levels.

Models were fit comparing each cluster against all other clusters.

| Cluster  | Covariates in unadjusted model | OR* (95% CI)               | AIC  | Covariates in severity-adjusted** model | OR* (95% CI)                | AIC   |
|----------|--------------------------------|----------------------------|------|-----------------------------------------|-----------------------------|-------|
| <b>1</b> |                                |                            | 87.7 |                                         |                             | 85.4  |
|          | CXCL10                         | 238.1 (6.1, 9,238.2)       |      | Severity                                | 4.9 (2.0, 11.9)             |       |
|          | IL1RA                          | 4.3 (2.1, 8.9)             |      | IL1RA                                   | 4.1 (2.1, 8.2)              |       |
|          | RAGE                           | 0.0007 (0.00005, 0.01)     |      | RAGE                                    | 0.001 (0.00008, 0.02)       |       |
| <b>2</b> |                                |                            | 91.9 |                                         |                             | 102.0 |
|          | Ferritin                       | 1.0 (0.990, 0.997)         |      | Severity                                | 0.4 (0.1, 0.9)              |       |
|          | Procalcitonin                  | 2.5e-14(1.7e-22, 3.6e-06)  |      | Procalcitonin                           | 2.8e-14 (06.5e-22, 1.2e-06) |       |
|          | RAGE                           | 839.1 (58.7, 11,991.9)     |      | RAGE                                    | 217.0 (24.2, 1,948.7)       |       |
| <b>3</b> |                                |                            | 58.7 |                                         |                             | 73.4  |
|          | Ferritin                       | 1.0 (1.002, 1.007)         |      | Severity                                | 1.9 (0.9, 3.9)              |       |
|          | VEGFA                          | 3.1e-46 (3.2e-72, 2.9e-20) |      | VEGFA                                   | 1.1e-33 (2.6e-53, 4.8e-14)  |       |

**AIC: Akaike information criterion****\*Estimates are in ng/ml scale.****\*\*Peak severity on an ordinal scale with outpatient-level= 0, inpatient-level=1, ICU-level care =2, death =3**

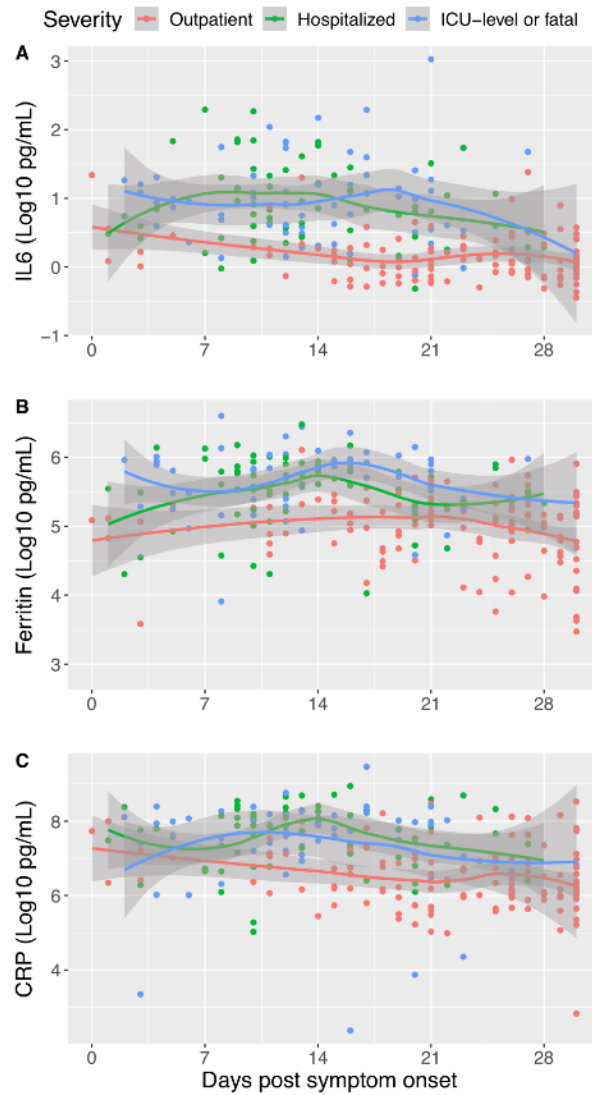

**Supplementary Figure S1.** Scatter plot with plasma IL6 (A), ferritin (B), and CRP (C) over time with LOESS (locally estimated scatterplot smoothing) curves stratified by peak severity from EPICC cohort between 0 to 29 days post symptom onset. While participants with mild illness have a down sloping LOESS curve, participants with moderate or severe illness had a late peaking curve during the third and fourth week of illness (the inflammatory phase). Each point represents a sample level with some participants having multiple samples collected. Points are jittered to avoid overplotting.

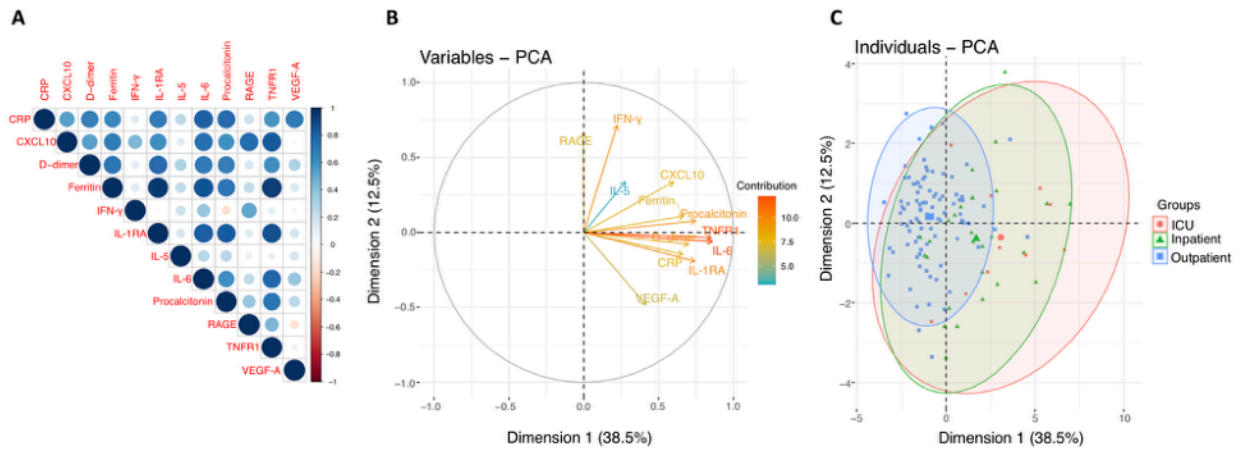

**Supplementary Figure S2.A:** Spearman's correlation matrix of inflammation biomarkers with size and color scale for correlation coefficient; B: PCA showing dimensionality of different analytes; C: PCA showing dimensionality of different analytes with peak severity labeled by color.

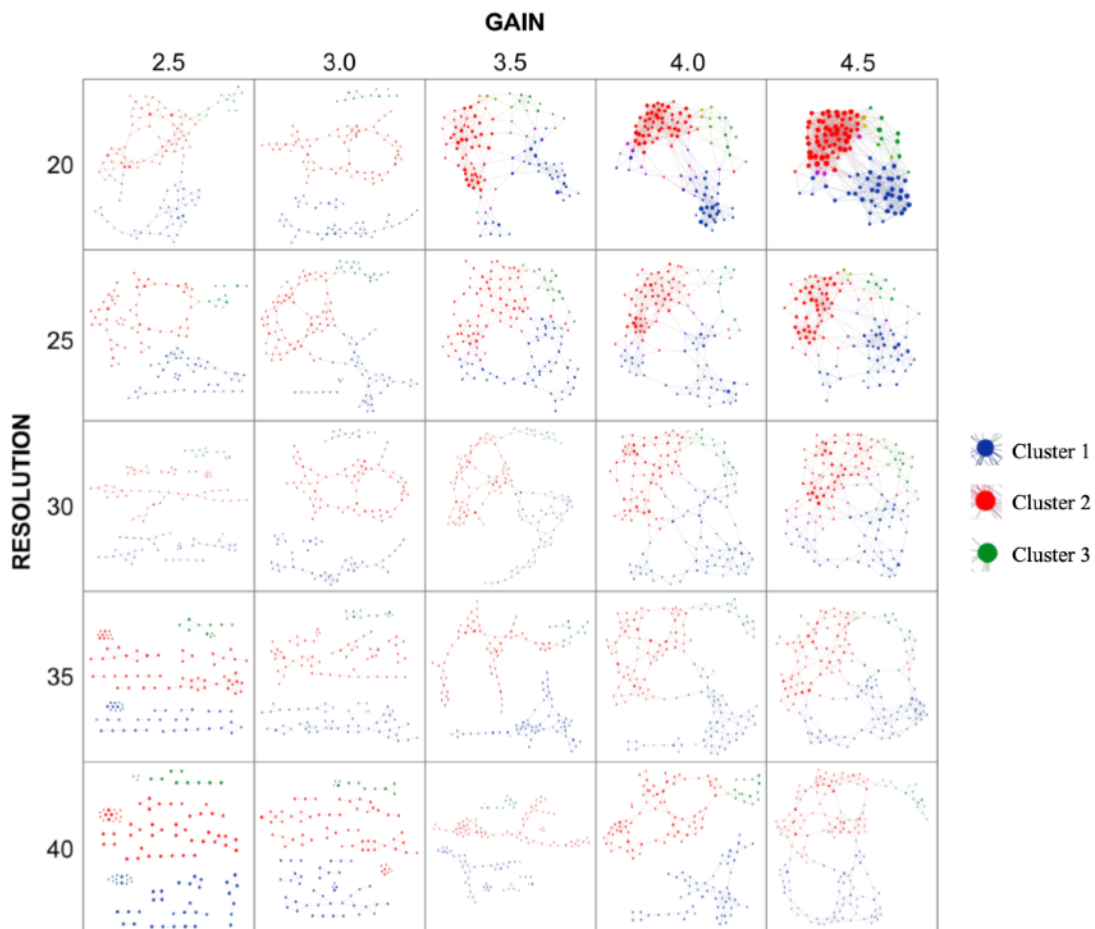

**Supplementary Figure S3.** TDA networks were generated for a range of resolution settings to examine the persistence of subject clusters and their interrelatedness. Clusters 1 (blue), 2 (red), and 3 (green) were observed consistently throughout different resolution and gain settings in the EurekaAI Workbench platform (SymphonyAI, Los Altos, CA, USA). Each node represents a combination of 12 plasma protein analyte levels and its size increases with the number of participants that are included.

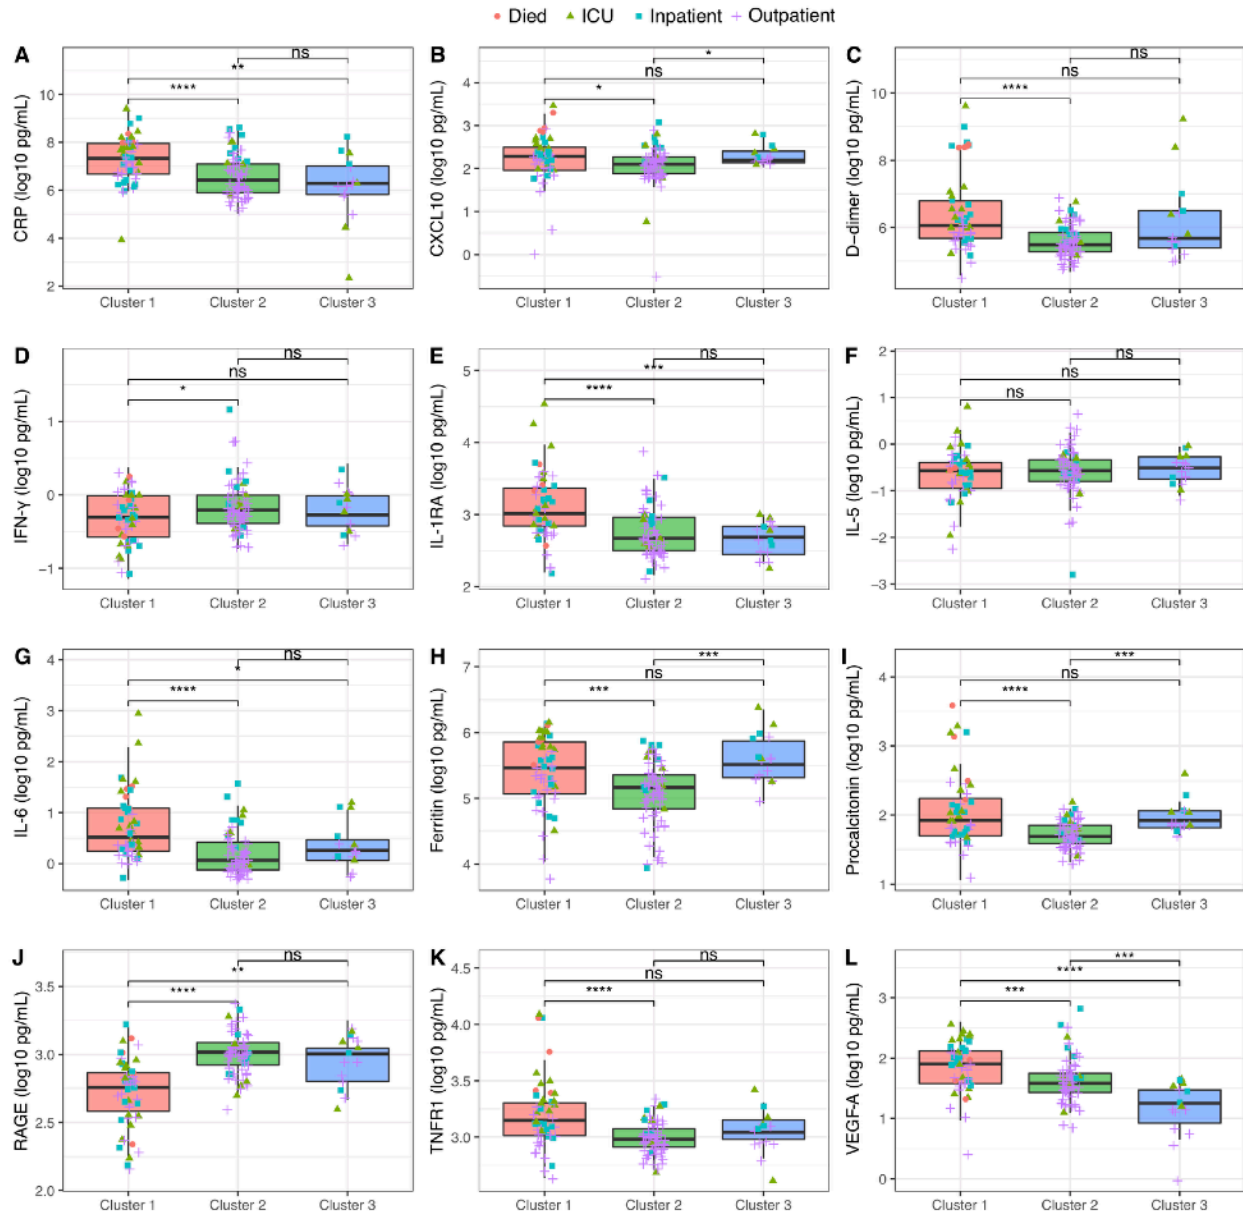

**Supplementary Figure S4.** Immune biomarkers divided by TDA cluster. Each sample with peak COVID severity labeled by color and shape. Kruskal-Wallis test performed comparing analyte levels between clusters. \*:  $p \leq 0.05$ ; \*\*:  $p \leq 0.01$ ; \*\*\*:  $p \leq 0.001$ ; \*\*\*\*:  $p \leq 0.0001$
